# Supplementary material
Source: publisher site journal article supplement (https://www.dovepress.com/article/515923)
Supplement: Supplementary file 1 [file get_supplementary_file.php]

| Pathway | Total Effect (b) | Direct Effect (b) | Indirect Effect (b) | 95% CI (Indirect Effect) | p-value (Indirect Effect) | Significance |
| --- | --- | --- | --- | --- | --- | --- |
| Stress --> Negative Mood --> Insomnia (Forward Path) | 0.39 | 0.21 | 0.19 | [0.06, 0.33] | 0.01 | Significant |
| Insomnia --> Negative Mood --> Stress (Reverse Path) | 0.38 | 0.24 | 0.14 | [-0.01, 0.32] | 0.15 | Non-Significant |

Suppl Table 1: Total, Direct, And Indirect Effects

This table presents the total, direct, and indirect effects for the mediation analysis examining the relationships between Stress, Negative Mood Affect (PANAS), and Insomnia (FIRST) in the forward and reverse pathways
